# Supplementary material
Source: PubMed Central journal article supplement (PMC4632635)
Supplement: rspb20151498supp1.pdf [file rspb20151498supp1.pdf]

## Electronic Supplementary Material

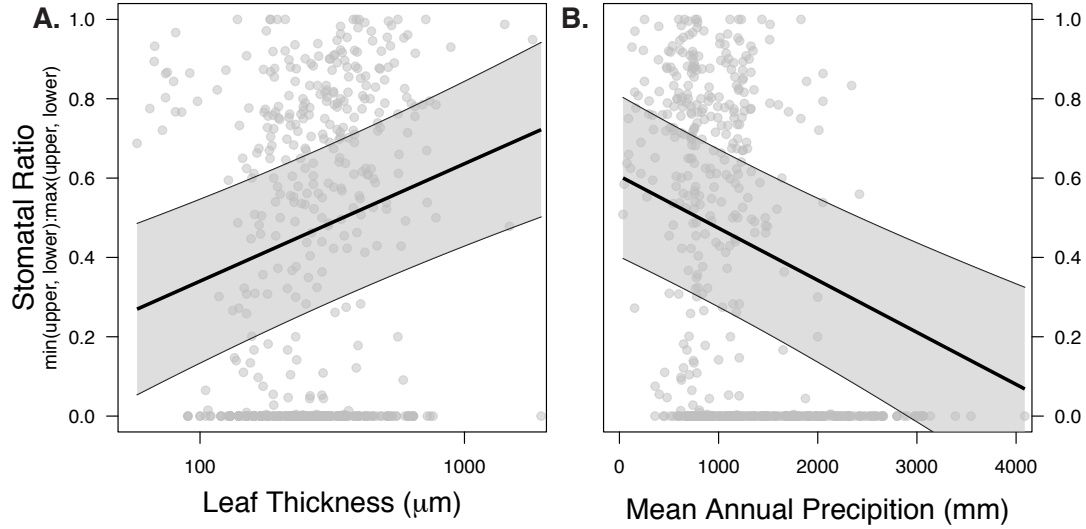

**Fig. S1. Amphistomy is weakly associated with thicker leaves and drier habitats.** Each point represents a species from the global dataset. The thick line and gray polygon are the median and 95% confidence intervals from the posterior distribution of predicted stomatal ratio as a function of leaf thickness or mean annual precipitation based on phylogenetic regression. The fitted lines and confidence intervals are drawn with growth form set to ‘perennial’ and other continuous predictor variables set to their median.

**Table S1. Multiple selective regimes are manifest in a multimodal trait distribution.** Models with multiple components ( $k$ ) corresponding to distinct selective regimes under a bounded Ornstein-Uhlenbeck process fit the data significantly better than models with a single regime (lower Bayesian Information Criterion [BIC]). In particular, the model with with three regimes is much more strongly supported than models with one or two regimes (see Fig. 1B–D for a visual representation of regimes). A mixture of multiple regimes, in turn, gives rise to a multimodal distribution with hypo-, amphi-, and hyperstomatous modes. For a given mixture, each of  $k$  regimes is represented as a component  $i$  parameterized by the strength of constraint ( $\phi_i$ ) around the long-term average ( $\theta_i$ ) and a mixture weight  $w_i$ .

| $k$ | Parameters                                                                                                                                                                                      | log-likelihood | df | BIC    |
|-----|-------------------------------------------------------------------------------------------------------------------------------------------------------------------------------------------------|----------------|----|--------|
| 1   | $\phi_1 = 0.4$ $\theta_1 = 0.17$ $w_1 = 1$                                                                                                                                                      | -604           | 2  | 1220.9 |
| 2   | $\phi_1 = 0.25$ $\theta_1 = 0.04$ $w_1 = 0.52$<br>$\phi_2 = 9.98$ $\theta_2 = 0.46$ $w_2 = 0.48$                                                                                                | -252.5         | 5  | 536.9  |
| 3   | $\phi_1 = 0.16$ $\theta_1 = 0.02$ $w_1 = 0.47$<br>$\phi_2 = 17.24$ $\theta_2 = 0.47$ $w_2 = 0.38$<br>$\phi_3 = 2.04$ $\theta_3 = 0.35$ $w_3 = 0.16$                                             | -237.7         | 8  | 526.6  |
| 4   | $\phi_1 = 6.99$ $\theta_1 = 0$ $w_1 = 0.44$<br>$\phi_2 = 1.6$ $\theta_2 = 0.35$ $w_2 = 0.17$<br>$\phi_3 = 16.85$ $\theta_3 = 0.47$ $w_3 = 0.38$<br>$\phi_4 = 181.8$ $\theta_4 = 0.99$ $w_4 = 0$ | -235.6         | 11 | 541.6  |

**Table S2. Growth form, anatomy, and precipitation jointly determine stomatal ratio.** Three models with varying levels of phylogenetic signal (Brownian motion [top], Pagel’s  $\lambda$  [middle], and nonphylogenetic [bottom]) identify growth form, leaf thickness, and mean annual precipitation as significantly associated with stomatal ratio.

| Stomatal Ratio $\sim$                      | df | SS     | MS    | F     | $P$                    |
|--------------------------------------------|----|--------|-------|-------|------------------------|
| <i>Brownian Motion</i>                     |    |        |       |       |                        |
| log(Leaf Thickness)                        | 1  | 0.017  | 0.017 | 20.31 | $8.08 \times 10^{-6}$  |
| Mean Annual Precipitation                  | 1  | 0.021  | 0.021 | 24.11 | $1.21 \times 10^{-6}$  |
| Elevation                                  | 1  | 0      | 0     | 0.08  | 0.78                   |
| Leaf Area Index                            | 1  | 0      | 0     | 0.05  | 0.82                   |
| Growth Form                                | 5  | 0.039  | 0.008 | 9.06  | $2.74 \times 10^{-8}$  |
| <i>Pagel’s <math>\lambda = 0.64</math></i> |    |        |       |       |                        |
| log(Leaf Thickness)                        | 1  | 0.008  | 0.008 | 24.38 | $1.05 \times 10^{-6}$  |
| Mean Annual Precipitation                  | 1  | 0.009  | 0.009 | 26.03 | $4.67 \times 10^{-7}$  |
| Elevation                                  | 1  | 0      | 0     | 0.26  | 0.61                   |
| Leaf Area Index                            | 1  | 0      | 0     | 0     | 1                      |
| Growth Form                                | 5  | 0.027  | 0.005 | 15.52 | $2.77 \times 10^{-14}$ |
| <i>Nonphylogenetic</i>                     |    |        |       |       |                        |
| log(Leaf Thickness)                        | 1  | 2.376  | 2.376 | 31.67 | $2.94 \times 10^{-8}$  |
| Mean Annual Precipitation                  | 1  | 1.711  | 1.711 | 22.81 | $2.31 \times 10^{-6}$  |
| Elevation                                  | 1  | 0.009  | 0.009 | 0.12  | 0.72                   |
| Leaf Area Index                            | 1  | 0.031  | 0.031 | 0.41  | 0.52                   |
| Growth Form                                | 5  | 15.897 | 3.179 | 42.38 | $7.36 \times 10^{-37}$ |

## 2 Appendix S1: Hypothesized benefits and costs of am- 3 phistomy

4 There are at least seven viable, non-mutually exclusive hypotheses for on the adaptive  
5 significance of amphistomy, five of which I evaluate here.

### 6 **H1: Leaf thickness**

7 The most widely cited and frequently tested diffusional limitation hypothesis is that  
8 amphistomy is adaptive in thick leaves. Models (1; 2) and experiments (3) demon-  
9 strate that the path length from substomatal cavities to chloroplasts can impose a  
10 large constraint on photosynthesis, especially when leaf thickness exceeds approxi-  
11 mately 300  $\mu\text{m}$ . Several studies have found a positive correlation between leaf thick-  
12 ness and amphistomy (1; 4; 5; 6; 7; 8; 9), but the evidence is equivocal (10; 11; 12).

### 13 **H2: Light**

14 A second hypothesis is that amphistomy is favoured in high light, open environments  
15 because  $\text{CO}_2$  becomes more limiting at high irradiance. H1 and H2 are difficult to  
16 disentangle, and could even reinforce one another, because leaf thickness increases  
17 under high irradiance (13). However, several studies have argued that the light  
18 environment, rather than leaf thickness, is the primary factor affecting selection on  
19 amphistomy (14; 15; 16; 11; 4; 17).

### 20 **H3: Precipitation**

21 Wood (18) observed that amphistomy was common in Australian deserts. Although  
22 amphistomy is sometimes common in dry environments, most studies conclude that  
23 precipitation is indirectly correlated with amphistomy because drier habitats also  
24 tend to be more open (14; 17). Nevertheless, the fact that amphistomy can in-  
25 crease water-use efficiency (1; 19) suggests that it might be favoured in dry habitats,  
26 independent of other factors.

### 27 **H4: Altitude**

28 Anatomical surveys demonstrate that amphistomy is sometimes more common in  
29 high elevation communities compared to nearby low elevation communities (20; 21;  
30 22), possibly because lower CO<sub>2</sub> partial pressures place a greater premium on effi-  
31 cient diffusion. However, this hypothesis is complicated by the fact that diffusion  
32 coefficients are higher at elevation because the air is thinner (23), meaning that CO<sub>2</sub>  
33 diffusion could actually be less limiting.

### 34 **H5: Growth form**

35 Independent of leaf anatomy and the abiotic environment, the strength of selection  
36 on photosynthetic rate might be stronger among certain growth forms (e.g. forbs  
37 vs. trees) because of their different life history strategies. Salisbury (1927) noted  
38 qualitatively that herbs tended to amphistomatous, an observation later confirmed  
39 by Peat and Fitter (1994). However, other reviews have argued that stomatal ratio

40 is not closely connected with any particular growth form (24; 11).

41 Two hypotheses I have not considered because of methodological limitations are  
42 that amphistomy is associated with vertically-oriented, isobilateral leaves (24) and  
43 that amphistomy, by doubling the conductive leaf surface area, relieves a constraint  
44 the stomatal size-density tradeoff (25; 8). I did not have sufficient, reliable informa-  
45 tion on leaf orientation and guard cell size to evaluate these hypotheses.

## 46 **Costs of upper stomata**

47 This study reaffirms at a global scale that most species are hypostomatous. The  
48 most parsimonious explanation for the preponderance of hypostomy is that there is  
49 cost to having stomata on the upper surface of the leaf. A fitness cost associated  
50 with increased evaporation (26) cannot explain the dearth of stomata on the upper  
51 leaf surface, though this explanation occasionally appears in the literature (27). In  
52 fact, amphistomy is common in some dry habitats (18; 1; 14; 4) and amphistoma-  
53 tous plants can be functionally hypostomatous when stressed by regulating stomatal  
54 aperture differentially on each surface (28; 29; 30; 19). Although amphistomatous  
55 plants can be functionally hypostomatous, the reverse is not true. Hence, anatomical  
56 amphistomy should be favoured whenever the capacity to be functionally amphis-  
57 tomatous is advantageous.

58 Besides evaporation, several fitness costs have been suggested, including decreased  
59 water-use efficiency of amphistomy in large leaves (1), photodamage to guard cell  
60 chloroplasts (W.K. Smith, pers. comm.), occlusion of upper stomata by water block-  
61 age (31), and increased susceptibility to foliar pathogens (2). Increased evaporation

62 is an unlikely explanation since so many desert species are anatomically amphis-  
63 tomatous (see above), but to my knowledge, most other hypotheses have not been  
64 rigorously tested. However, (32) showed that adaxial (upper) stomata pore area, but  
65 not abaxial (lower) pore area, was strongly correlated with susceptibility to a rust  
66 pathogen. Hence, the pathogen susceptibility hypothesis is best supported by the  
67 current data.

## 68 Appendix S2

### 69 Assembling a comparative data set

70 **Stomatal ratio and leaf thickness** I collected quantitative data on stomatal  
71 ratio and leaf thickness from previously published studies (see Appendix S6 for full  
72 list of data sources). These data are spread across a large and diverse literature,  
73 including functional ecology, taxonomy, agriculture, and physiology. Hence, nei-  
74 ther a standardized nor exhaustive search was possible. I started by using Web of  
75 Knowledge to locate studies that cited seminal papers on the adaptive significance of  
76 amphistomy, specifically (1) and (11). Once I found a paper with data, I examined  
77 papers that cited those ones. Finally, I found additional data sources in compre-  
78 hensive reviews of plant anatomy (33; 24; 34). For all data papers, I recorded the  
79 mean leaf thickness, abaxial (lower) and adaxial (upper) stomatal density for each  
80 species. Where only ranges were given, I used the midpoint. If the study included  
81 a treatment, I collected only data from the control treatment. If studies measured  
82 both juvenile and adult leaves, I used only adult leaves (no study reported only ju-  
83 venile leaves). Usually data were given in a table, but occasionally I used ImageJ  
84 (35) to extract data from figures or contacted authors for data. I only included data  
85 from studies that intentionally examined both surfaces for stomata; I excluded data  
86 from studies that described species categorically as “hypostomatous”, or “amphistom-  
87 atous”, or “hyperstomatous”. Excluding qualitative data was necessary because there  
88 is no standard definition of “amphistomy” – it has sometimes been used to describe  
89 species that have approximately equal densities on each side (1) and at other times  
90 for species that have any stomata on the both surfaces (36; 37).



91 **Climate and elevation** Based on the *a priori* hypotheses, I extracted data on  
92 mean annual precipitation (average 1950 – 2000), elevation (Worldclim (38)), and  
93 light environment (average leaf area index between 1982 – 1998 based on remote  
94 sensing (39)). For light environment, I used a satellite indicator of leaf area index,  
95 the number of leaf layers between the ground and top of the canopy. Lower leaf  
96 area index is interpreted as a more open light environment. The strength of these  
97 global data sources is that I was able to obtain data for every species from the same  
98 dataset. A limitation of these data is that even the highest resolution ( $\approx 1$  km)  
99 data might miss important temporal and microsite variation. I discuss these limita-  
100 tions in light of the findings in the Discussion. For climate and elevation, geographic  
101 coordinates for each species are needed. For this, I downloaded all georeferenced  
102 herbarium specimens for a given species from GBIF (last accessed Jan 15–18, 2015)  
103 using the `occ_search` function in R package **rgbif** (40). I filtered out or manually  
104 edited clearly erroneous locations (e.g. lat = 0 or lon = 0 or where lat and lon were  
105 clearly reversed). The mean and median number of GBIF georeferenced occurrences  
106 per species was 737 and 194, respectively. I calculated the trimmed-mean (10% trim)  
107 mean annual precipitation, elevation, and leaf area index to further remove speci-  
108 mens well outside the species’ range, possibly because they were, say, misidentified,  
109 cultivated, or improperly georeferenced.

110 **Growth Form** I partitioned species by growth form into the following categories:  
111 trees, small trees/shrubs, shrubs, and herbaceous species (forbs and grasses). Herba-  
112 ceous species were further subdivided into annuals, biennials, and perennials. Species  
113 that were variable or intermediate (e.g. annual/biennial, annual/perennial, bien-  
114 nial/perennial, or annual/biennial/perennial) were classified as ‘biennial’. Subshrubs

115 with some woody growth were lumped with perennials rather than shrubs. Where  
116 possible, I obtained growth form data from associated data papers. When this infor-  
117 mation was not given, I used regional floras, supplemented by online trait databases  
118 such as USDA Plants (41) and Encyclopedia of Life (42). When these sources were  
119 unavailable or ambiguous for a given species, I checked the primary taxonomic liter-  
120 ature by searching the species name in Google Scholar.

121 **Taxonomic name resolution** I submitted taxonomic names in the database to  
122 the Taxonomic Name Resolution Service (TNRS) (43). I used names given by TNRS  
123 when it returned an accepted name or synonym with overall score greater than 0.97  
124 (scores are between 0 to 1). I scrutinized names where TNRS deemed the name  
125 illegitimate, gave no opinion, or was otherwise ambiguous. At that point, I consulted  
126 additional plant taxonomic repositories: The Plant List (44), International Plant  
127 Names Index (45), and the Euro+Med PlantBase (46). When no accepted names  
128 were identified, I used original name given by the authors. For two very recent  
129 papers with up to date taxonomy by experts (8; 47), I used the names given by those  
130 authors.

## 131 **Testing adaptive hypotheses for stomatal ratio using phyloge-** 132 **netic regression**

133 For this analysis I quantified stomatal ratio as  $\min(\text{upper density, lower density}) : \max(\text{upper}$   
134  $\text{density, lower density})$ . In this form, stomatal ratio equals 1 when the densities on  
135 each surface are the same, and goes to 0 as the distribution become more asymmet-  
136 rical (hypostomy or hyperstomy). Note that this form differs from what I use in

137 analyzing multimodality because I wanted to specifically test which factors favour  
138 the photosynthetically optimal distribution (amphistomy) versus suboptimal distri-  
139 butions (either hypo- or hyperstomy). I constructed a phylogeny for species in the  
140 dataset using a Phylomatic (48) megatree approach. To examine whether results  
141 were robust to phylogenetic correction, I analyzed the data using three methods:  
142 Brownian motion (high phylogenetic signal), Pagel's  $\lambda$  (intermediate phylogenetic  
143 signal), and no phylogenetic signal (normal ANOVA). For the intermediate signal  
144 model, I estimated Pagel's  $\lambda$  using maximum likelihood. Phylogenetic models were  
145 fit using phylogenetic least squares in the R package **caper** (49). The trait dataset  
146 and phylogeny used in these analyses are available on Dryad (50).

## 147 **Appendix S3: An evolutionary process model for pro-** 148 **portion traits**

149 Making evolutionary sense of a biological pattern requires an underlying process  
150 model to provide the theoretical foundation on which data analysis rests. A pow-  
151 erful approach in macroevolution involves modelling trait evolution on phenotypic  
152 landscapes with or without constraint (51; 52; 53). If models with constraint describe  
153 the data better than those without, then there is compelling evidence that pheno-  
154 typic landscapes are shaped by some combination of selective, genetic, functional, or  
155 developmental constraints. Furthermore, phenotypic landscapes may change under  
156 multiple regimes, meaning that a trait is best described by a mixture of distributions,  
157 each generated under separate regimes (54; 55; 56). Current evolutionary process  
158 models such as Brownian motion and Ornstein-Uhlenbeck assume that traits follow  
159 a Gaussian distribution, but this is clearly inappropriate for traits like stomatal ra-  
160 tio. In this section, I modify previous evolutionary process models to accommodate  
161 proportion traits and derive the expected pattern given phenotypic landscapes that  
162 are constrained versus those that are unconstrained. This model provides a strong  
163 theoretical foundation for the model-based statistical inference described below. A  
164 glossary of symbols used in this text are provided in Table S3.

165 In both models with and without constraint, I assume that *total* stomatal density  
166 follows a random walk over macroevolutionary time, though the exact process is  
167 irrelevant here. Imagine for a set area ( $A_{\text{leaf}}$ ) of leaf (e.g.  $1 \mu\text{m}^2$ ) there are  $N_T(t) =$   
168  $A_{\text{leaf}}D_T(t) = A_{\text{leaf}}(D_U(t) + D_L(t))$ , where  $N_T(t)$  is the total number of stomata in  
169 that area at time  $t$ . Total stomatal number  $N_T(t)$  is the sum of upper ( $N_U(t)$ )

**Table S3. Glossary of symbols used in process models of stomatal trait evolution.**

| Symbol            | Description                                                                                                              |
|-------------------|--------------------------------------------------------------------------------------------------------------------------|
| $r$               | Stomatal ratio: ratio of upper to total stomatal density                                                                 |
| $N_T, N_U, N_L$   | Number of stomata in a focal leaf area $A_L$<br>The total number $N_T$ is the sum of upper $N_U$ and lower $N_L$ stomata |
| $D_T, D_U, D_L$   | Density of stomata in total, upper, and lower surfaces                                                                   |
| $A_{\text{leaf}}$ | Focal leaf area                                                                                                          |
| $\nu$             | Diffusion coefficient of stomatal ratio                                                                                  |
| $\theta$          | Long-run average stomatal ratio                                                                                          |
| $\alpha$          | Return rate to long-run average ratio                                                                                    |
| $\phi$            | Defined as $\nu\alpha$                                                                                                   |
| $M_{\delta x}$    | Drift function of stomatal ratio $r$ in diffusion approximation                                                          |
| $V_{\delta x}$    | Diffusion function of stomatal ratio $r$ in diffusion approximation                                                      |

170 and lower ( $N_L(t)$ ) stomata. Let  $\Delta N_{T,t} = N_T(t+1) - N_T(t)$  be the change in total  
171 stomatal number that must be made up of changes in upper stomata, lower stomata,  
172 or some combination of both. I assume that the contribution to  $\Delta N_{T,t}$  from upper  
173 and lower stomata is proportional to their density. For reasons explained below, I  
174 define  $\nu = N_T(t+1)$  as the total stomata at time  $t+1$ . The transition rate  $u_{ij}$  from  
175  $N_U = i$  upper stomata at time  $t$  to  $N_U = j$  upper stomata at time  $t+1$  is binomially  
176 distributed with a rate determined by the stomatal ratio  $r$ :

$$u_{ij} = \binom{\nu}{j} r^j (1-r)^{\nu-j} \quad j \in \{0, 1, 2, \dots, \nu\} \quad (\text{S1})$$

177 Note that stomatal ratio here is defined as the proportion of upper stomata,  $r =$   
178  $N_U/(N_U + N_L) = N_U/N_T = N_U/\nu$ . What this assumption says is that increasing  
179 stomatal density (upper or lower) from 100 to 120 is much easier than increasing  
180 density from, say, 0 to 20 or 10 to 30. Formally, the mean and variance of stomatal

181 ratio in the next time step is therefore:

$$\mu(r) = \mathbb{E} \left[ \frac{N_U}{\nu} \right] = r \quad (\text{S2})$$

$$\sigma^2(r) = \mathbb{E} \left[ \left( \frac{N_U}{\nu} \right)^2 \right] - \left( \mathbb{E} \left[ \frac{N_U}{\nu} \right] \right)^2 = \frac{r(1-r)}{\nu} \quad (\text{S3})$$

182 In other words, the average stomatal ratio does not change, but the variance  
183 increases each time step. When  $\nu$  is large, the distribution can be approximated with  
184 a normal distribution and a diffusion approximation can be used to model the long  
185 term evolution of the trait. This diffusion process is analogous to Brownian motion,  
186 except that the trait is bounded by 0 and 1. It is also mathematically equivalent  
187 to one-locus, two-allele population genetic models of neutral evolution (see (57) for  
188 a detailed derivation). I will make reference to results from this literature without  
189 rigorously deriving them here. In particular, it has been shown that the stationary  
190 distribution of the diffusion is:

$$f(r) = \frac{e^{A(r)} (c_1 \int e^{-A(r)} dr + c_2)}{V_{\delta x}} \quad (\text{S4})$$

191 where

$$A(r) = \int \frac{2M_{\delta x}}{V_{\delta x}} dr \quad (\text{S5})$$

$$M_{\delta x} = 0 \quad (\text{S6})$$

$$V_{\delta x} = \frac{r(1-r)}{\nu} \quad (\text{S7})$$

192 and the time scale is in units of  $\nu^{-1}$ . Thus,  $\nu$  can be interpreted as a diffusion  
 193 coefficient without necessarily specifying a genetic or developmental mechanism that  
 194 governs the amount of variance in stomatal ratio from one time to the next. Solving  
 195 for  $f(r)$  without constraint on stomatal ratio yields:

$$f(r) = \frac{6}{r(1-r)} \quad (\text{S8})$$

196 Thus, without constraint on stomatal ratio, most species should be hypo- or hyper-  
 197 stomatous under this model (Fig. S2), as these act like absorbing boundaries. This  
 198 shows, perhaps surprisingly, that bounded traits evolving without constraint behave  
 199 very differently from standard quantitative traits, which are usually expected to fol-  
 200 low a unimodal Gaussian distribution. A plausible alternative approach to absorbing  
 201 boundaries is to assume reflecting boundaries. In other words, species don't get stuck  
 202 at 0 or 1, but can 'bounce' back into the middle of the distribution. In this case,  
 203 the stationary distribution of the trait is uniform between 0 and 1. Thus, even with  
 204 reflecting boundaries, one would not expect bounded traits to follow a distribution  
 205 with an interior mode in the absence of phenotypic constraint.

206 Next, I modify the model to include constraint around a long-run average  $\theta$ , which

207 may be interpreted an optimum of a selective regime. This process model is analogous  
 208 to an Ornstein-Uhlenbeck process for a proportion trait. I again use the diffusion  
 209 approximation, but this time the drift and diffusion coefficients are:

$$M_{\delta x} = \alpha(\theta - r) \tag{S9}$$

$$V_{\delta x} = \frac{r(1-r)}{\nu} \tag{S10}$$

210  $\alpha$  is the return rate to  $\theta$ . Greater values of  $\alpha$  constrain trait variation more tightly  
 211 around  $\theta$ . With these coefficients and setting the first constant of integration  $c_1$  to 0  
 212 yields:

$$f(r) = c_2 \nu r^{2\alpha\nu\theta-1} (1-r)^{2\alpha\nu(1-\theta)-1} \tag{S11}$$

213 where:

$$c_2 = 1 / \int_0^1 \nu r^{2\alpha\nu\theta-1} (1-r)^{2\alpha\nu(1-\theta)-1} dr \tag{S12}$$

$$= \frac{1}{\nu B(2\alpha\nu\theta, 2\alpha\nu(1-\theta))} \tag{S13}$$

214  $B(\cdot)$  is the beta function. Setting  $c_1$  to 0 can be justified by recognizing that the  
 215 distribution should be symmetrical ( $x = 1 - x$ ) when  $\theta = 0.5$ , which only occurs if



216  $c_1 = 0$  (S.P. Otto pers. comm.). Further, I confirmed the accuracy of the analytically-  
217 derived stationary distribution using stochastic simulations (data not shown).

218 Defining  $\phi = \alpha\nu$ , the stationary distribution simplifies somewhat to:

$$f(r) = \frac{r^{2\phi\theta-1}(1-r)^{2\phi(1-\theta)-1}}{\text{B}(2\phi\theta, 2\phi(1-\theta))} \quad (\text{S14})$$

219 This is the Beta( $\alpha, \beta$ ) distribution with  $\alpha = 2\phi\theta$  and  $\beta = 2\phi(1-\theta)$ . Note that,  
220 following standard notation,  $\alpha$  here refers to the first shape parameter of the Beta  
221 distribution, not the constraint factor of the evolutionary process model. This re-  
222 sult means that the well-known statistical properties of the Beta distribution can  
223 be leveraged to understand the stationary distribution of a proportion trait under  
224 a constrained phenotypic landscape. For example, the Beta distribution takes on  
225 a variety of shapes that begin to resemble the distribution of proportional traits  
226 like stomatal ratio (Fig. S3). Hence, the evolutionary process model developed here  
227 provides a strong theoretical justification for fitting the stomatal ratio data to a mix-  
228 ture of Beta distributions in order to infer the regimes shaping this trait across plant  
229 species. Although I have derived the model with stomatal ratio in mind, it should  
230 be applicable to wide variety of proportional traits evolving under a constrained  
231 phenotypic landscapes.

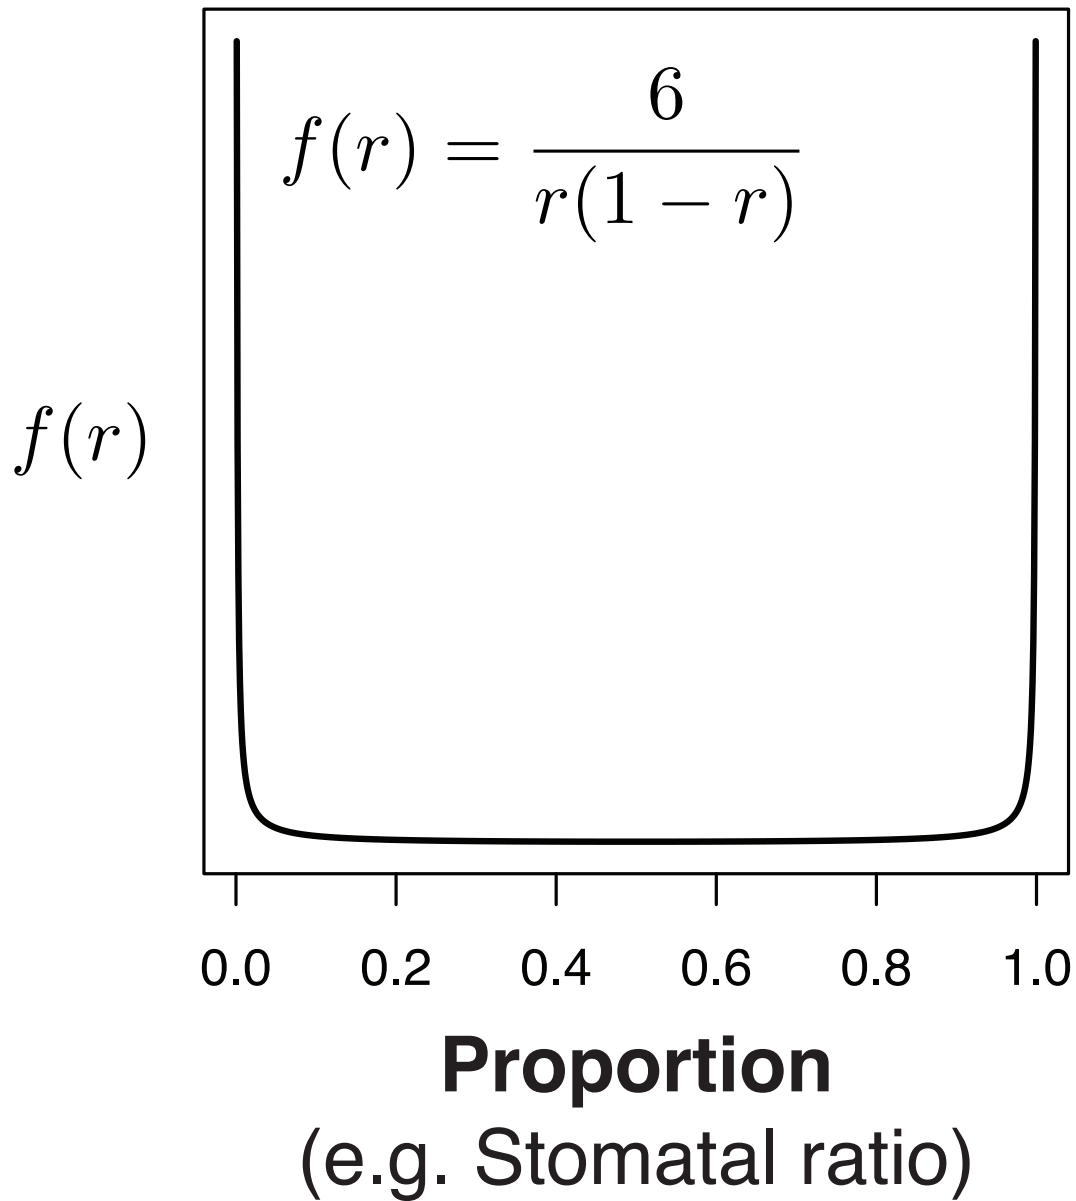

Fig. S2. Without constraint, a proportion trait like stomatal ratio ( $r$ ) will evolve toward a distribution in which most species are 0 or 1.

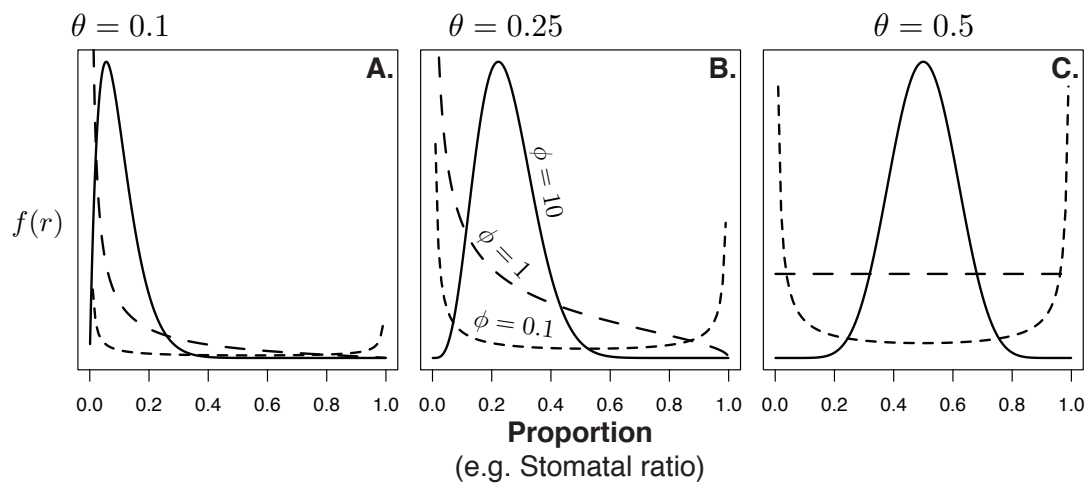

**Fig. S3. A proportion trait like stomatal ratio evolving under a single regime is Beta distributed.** The Beta distribution can take on a wide variety of shapes depends on the long-run average  $\theta$  and the levels of constraint  $\phi$  (greater  $\phi$  equals greater constraint).

## 232 **Appendix S4: Phenotypic distributions have time to reach sta-** 233 **tionarity**

234 Appendix S3 showed that under a bounded Ornstein-Uhlenbeck model, a proportion  
235 trait like stomatal ratio should be Beta-distributed at stationarity. Hence, fitting  
236 the data to a Beta distribution would be valid if the trait distribution is close to  
237 stationarity. In particular, if the rate (denoted  $\alpha$ ) at which lineages return to the  
238 long-run average ( $\theta$ ) is fast relative to the frequency of regime shifts (e.g. hypo- to  
239 amphistomy), then the observed distribution is probably close to stationarity. In  
240 this appendix, I estimate the rate of stomatal ratio regime shifts using SIMMAP and  
241 the return rate ( $\alpha$ ) under a standard OU model ( $OU_{\text{norm}}$ ) as it is not yet possible to  
242 estimate this parameter using the  $OU_{\text{beta}}$  model.

### 243 **Mapping regime shifts using SIMMAP**

244 I calculated the probability that each species (i.e. a tip in the phylogeny) belongs to  
245 one of three regimes (hypo, amphi, or intermediate) identified using finite mixture  
246 models. The probability of belonging to a given regime was calculated using Eq  
247 S21 with parameter estimates from the the three-regime model ( $k = 3$  parameters  
248 in Table S1). From the tip state probabilities, I estimated the maximum likelihood  
249 transition matrix  $\mathbf{Q}$  between regimes using the `make.simmap` function in the R pack-  
250 age **phytools** version 0.4-56 (58). The function implements SIMMAP, a method for  
251 mapping discrete trait evolution on phylogenies (59). The asymmetric transition rate  
252 model (AIC = 858) fit better than symmetric (AIC = 878) and equal rate (AIC =  
253 911) models. The full transition matrix is:

$$\mathbf{Q} = \begin{pmatrix} & q_{h \rightarrow i} & q_{h \rightarrow a} \\ q_{i \rightarrow h} & & q_{i \rightarrow a} \\ q_{a \rightarrow h} & q_{a \rightarrow h} & \end{pmatrix}$$

254 The subscripts below each transition rate  $q$  indicate the regimes (a = amphistom-  
 255 atous; i = intermediate; h = hypostomatous). The maximum-likelihood estimated  
 256 transition matrix is:

$$\hat{\mathbf{Q}} = \begin{pmatrix} & 0 & 0 \\ 1.8 \times 10^{-2} & & 1.3 \times 10^{-2} \\ 5.0 \times 10^{-4} & 5.1 \times 10^{-3} & \end{pmatrix}$$

257 Interestingly, the transition rates from the intermediate to hypo- or amphistomatous  
 258 regimes ( $q_{i \rightarrow h}, q_{i \rightarrow a}$ ) are much higher than that from hypostomy or amphistomy to  
 259 intermediate ( $q_{h \rightarrow i}, q_{a \rightarrow i}$ ). This suggests that the intermediate regime is relatively  
 260 transitory, whereas lineages that enter hypo or amphi regimes remain there for a  
 261 long time. Next, I simulated 1000 maps of regime shifts on the tree from  $\hat{\mathbf{Q}}$ . For  
 262 each species, in all 1000 simulated maps, I calculated the median time a species had  
 263 spent in its current regime. For species in hypo- and amphistomatous regimes, the  
 264 time was very high, 93 and 225 my, respectively. Species spent much less time in the  
 265 intermediate regime (median = 42 my).

## 266 Estimating phylogenetic signal using OUwie

267 In Ornstein-Uhlenbeck models, low  $\alpha$  indicates a weak ‘pull’ back toward the long-  
268 average  $\theta$ . In contrast, high  $\alpha$  means that traits value bounce around rapidly. Hence,  
269  $\alpha$  estimates phylogenetic signal. For example, the phylogenetic half-life, or time it  
270 takes for the trait correlation between ancestor and descendant to be halved, is equal  
271 to  $\log(2)/\alpha$ . I simulated 1000 stochastic character maps from the estimated transition  
272 matrix  $\hat{Q}$ . For each tree, I used the R package **OUwie** version 1.45 (60; 61) to fit single  
273 and three-regime Brownian motion and Ornstein-Uhlenbeck models. Specifically, I  
274 fit single-regime Brownian motion ( $BM_1$ ) and Ornstein-Uhlenbeck ( $OU_1$ ) models as  
275 well as three-regime Brownian motion ( $BMS_3$  – separate diffusion parameters for each  
276 regime) and Ornstein-Uhlenbeck ( $OUM_3$  and  $OUMV_3$ ). Both  $OUM_3$  and  $OUMV_3$   
277 models fit different optima ( $\theta$ ) for each regime but assume a shared  $\alpha$ . However,  
278 the  $OUMV_3$  allows different diffusion parameters ( $\sigma^2$ ) for each regime. I did not  
279 use models ( $OUMV_3$ ,  $OUMVA_3$ ) that estimate different  $\alpha$ ’s for each regime because  
280 these were often numerically unstable and the regime-specific  $\alpha$ ’s were very similar  
281 (data not shown). Following (62), I estimated parameters as the median across 1000  
282 character maps. I compared model fit using the median BIC across 1000 character  
283 maps.

284  $OU_{\text{norm}}$  results confirm those using  $OU_{\text{beta}}$ : a three-regime OU model fits much better  
285 (lower BIC) than single-regime and BM models, even after accounting for phyloge-  
286 netic nonindependence. It also suggests for hypo and amphi regimes, there is ample  
287 time for trait distributions to approach stationarity. The estimated phylogenetic  
288 half-life,  $\log(2)/\alpha = 22$  my is far below the median estimate for time species have  
289 evolved in their present-day regime, 42–225 my, depending on the regime.

**Table S3: Parameter estimates of one ( $X_1$ ) and three ( $X_3$ ) regime models using OUwie.** I fit Brownian motion (BM) and Ornstein-Uhlenbeck (OU) models to the stomatal ratio data. Unlike the  $\text{OU}_{\text{beta}}$  parameter estimates, these analyses account for phylogeny.  $\alpha$  is the return rate to the long-run average ( $\theta_i$ ) of regime  $i$ .  $\sigma_i^2$  is the diffusion coefficient for regime  $i$ . For one regime models, maximum likelihood parameters are reported. For three-regime models, I report the median parameter and Bayesian Information Criterion (BIC) values from 1000 maps of regime shifts across the phylogeny.

| Model             | $\alpha$             | $\sigma_1^2$         | $\sigma_2^2$         | $\sigma_3^2$         | $\theta_1$ | $\theta_2$ | $\theta_3$ | BIC  |
|-------------------|----------------------|----------------------|----------------------|----------------------|------------|------------|------------|------|
| BM <sub>1</sub>   | na                   | $4.9 \times 10^{-4}$ | na                   | na                   | 0.162      | na         | na         | -180 |
| OU <sub>1</sub>   | $5.6 \times 10^{-3}$ | $7.3 \times 10^{-4}$ | na                   | na                   | 0.188      | na         | na         | -216 |
| BMS <sub>3</sub>  | na                   | $1.5 \times 10^{-4}$ | $1.5 \times 10^{-3}$ | $2 \times 10^{-4}$   | 0.012      | na         | na         | -462 |
| OUM <sub>3</sub>  | $2.4 \times 10^{-2}$ | $1 \times 10^{-3}$   | na                   | na                   | -0.026     | 0.238      | 0.467      | -602 |
| OUMV <sub>3</sub> | $3.1 \times 10^{-2}$ | $5 \times 10^{-4}$   | $1.1 \times 10^{-2}$ | $5.6 \times 10^{-4}$ | -0.005     | 0.226      | 0.468      | -804 |

## 290 **Appendix S5: Fitting evolutionary process to pattern** 291 **using finite mixture models estimated with maximum** 292 **likelihood**

293 Before presenting statistical details, I must provide some caveats about my approach.  
294 Although I do not think these qualifications affect any of the main conclusions of  
295 this paper, they are important for others who might use similar methods or, better  
296 yet, seek to extend them. I tested for multiple regimes using a conceptually similar  
297 but somewhat different approach than previous studies. Current methods for infer-  
298 ring multiple selective regimes (54; 55; 56) cannot yet accommodate Beta-distributed  
299 traits, and there is no general solution to the stochastic differential equation in Ap-  
300 pendix S3. Future work is needed to develop numerical methods to integrate the  
301 bounded Ornstein-Uhlenbeck process model elaborated here into existing statistical  
302 frameworks for multi-regime inference. However, the fact that distantly-related plant  
303 families converge on similar trait distributions strong suggests that the main results  
304 are robust to phylogenetic nonindependence.

305 I infer the number of regimes acting on stomatal ratio by fitting a mixture of sta-  
306 tionary distributions derived from the process model above to the data. By fitting  
307 the data to the stationary distribution, I implicitly assume that evolution is suffi-  
308 ciently rapid to ignore phylogenetic signal. Numerical simulations of the diffusion  
309 indicate that the transitory distribution is also Beta (data not shown), meaning that  
310 evidence for multiple regimes cannot be an artifact of transitory behaviour within  
311 a single regime. In this section I derive the likelihood functions and describe an  
312 expectation-maximization algorithm to find the maximum likelihood mixture model



313 given the data. R code to implement these methods is available on Dryad (50). In  
 314 general, finite mixture distributions are the summation of  $k \geq 2$  mixture components  
 315 (i.e. probability distributions) with density  $f_i(x)$  and mixture weight  $w_i$ :

$$g(x; k) = \sum_{i=1}^k w_i f_i(x) \quad (\text{S15})$$

316 Here the  $i$ -th mixture component has a probability density  $f_i(x)$  given by the  
 317 stationary distribution in Eq S14 with parameters  $\theta_i, \phi_i$ . The likelihood of a mixture  
 318 distribution given  $k$  mixture components and a data vector  $\mathbf{x}$  with sample size  $n$  is  
 319 the weighted sum of the likelihoods of each component:

$$\mathcal{L}(\mathbf{w}, \boldsymbol{\phi}, \boldsymbol{\theta}; \mathbf{x}, k) = \sum_{i=1}^k w_i \mathcal{L}_i(\phi_i, \theta_i; \mathbf{x}) \quad (\text{S16})$$

320 The parameter vectors  $\mathbf{w}$ ,  $\boldsymbol{\phi}$ , and  $\boldsymbol{\theta}$  are defined as:

$$\mathbf{w} := \{w_1, \dots, w_k\} \quad (\text{S17})$$

$$\boldsymbol{\phi} := \{\phi_1, \dots, \phi_k\} \quad (\text{S18})$$

$$\boldsymbol{\theta} := \{\theta_1, \dots, \theta_k\} \quad (\text{S19})$$

321 For the  $i$ -th component, the likelihood of parameters  $\phi_i$  and  $\theta_i$  given the data is the

322 product of the probability densities of each datum  $(x_1, x_2, \dots, x_n)$ :

$$\mathcal{L}_i(\phi_i, \theta_i; \mathbf{x}) = \prod_{j=1}^n f_i(x_j; \phi_i, \theta_i) \quad (\text{S20})$$

323 To obtain reasonable fits, I found it necessary to modify the likelihood to incorpo-  
 324 rate left- and right-censored data. This is because the stomatal ratio dataset contains  
 325 many 0's (all stomata are on the lower surface of the leaf) and 1's (all stomata on the  
 326 upper surface). Under most parameterizations of the Beta distribution, the proba-  
 327 bility density of 0 and 1 is  $\infty$  or 0. I left- and right-censored the data at  $x_l = 0.001$   
 328 and  $x_r = 0.999$  as these were very close to the lowest and highest values reported  
 329 in the dataset (except 0 and 1), respectively. This means that any datum reported  
 330 as 0 was statistically interpreted as falling anywhere between 0 and 0.001. Likewise,  
 331 a datum reported as 1 was assumed to fall between 0.999 and 1. A reasonable in-  
 332 terpretation is that a stomatal ratio so close to 0 or 1 would be practically difficult  
 333 to measure. Biologically, a stomatal ratio less than 0.001 or greater than 0.999 are  
 334 indistinguishable from 0 and 1. With censoring, the likelihood of the  $i$ -th component  
 335 becomes:

$$\mathcal{L}_i(\phi_i, \theta_i; \mathbf{x}) = \prod_{j=1}^n f(x; \phi_i, \theta_i)^{I_l(x)I_r(x)} F(x_l; \phi_i, \theta_i)^{1-I_l(x)} (1 - F(x_r; \phi_i, \theta_i))^{1-I_r(x)} \quad (\text{S21})$$

336  $F(x; \phi_i, \theta_i)$  is the cumulative density function of the Beta distribution;  $I_l(x)$  and  
 337  $I_r(x)$  are indicator functions:

$$I_l(x) = \begin{cases} 0 & \text{if } x = x_l \\ 1 & \text{if } x \neq x_l \end{cases} \quad (\text{S22})$$

$$I_r(x) = \begin{cases} 0 & \text{if } x = x_r \\ 1 & \text{if } x \neq x_r \end{cases} \quad (\text{S23})$$

338 To find the maximum likelihood mixture distribution, I used an expectation-  
 339 maximization (EM) algorithm similar to (63). EM algorithms are particularly well-  
 340 suited to fitting mixture distributions. Here, I describe the initialization, expectation  
 341 (E-step), and maximization (M-step) procedure.

### 342 **Initialization**

343 The data were divided into  $k$  evenly-sized components. For example, if  $k = 2$ ,  
 344 data below the median were assigned to component 1; data above the median were  
 345 assigned to component 2. For each component, the initial weight was therefore  
 346  $w_{i,\text{init}} = 1/k$ . Within each component, I used the optim function in R to estimate the  
 347 maximum likelihood parameters ( $\hat{\phi}_i^{(\text{init})}$  and  $\hat{\theta}_i^{(\text{init})}$ ) of a Beta distribution. Note that I  
 348 am using parenthetical superscript to indicate the iteration of the algorithm, starting  
 349 with the initial parameterization, followed by  $t = 1, 2, 3, \dots$  until the likelihood  
 350 converges. The initial parameter vectors are therefore:

$$\mathbf{w}^{(\text{init})} := \{1/k, \dots, 1/k\} \quad (\text{S24})$$

$$\boldsymbol{\phi}^{(\text{init})} := \{\hat{\phi}_1^{(\text{init})}, \dots, \hat{\phi}_k^{(\text{init})}\} \quad (\text{S25})$$

$$\boldsymbol{\theta}^{(\text{init})} := \{\hat{\theta}_1^{(\text{init})}, \dots, \hat{\theta}_k^{(\text{init})}\} \quad (\text{S26})$$

## 351 Expectation

352 In the E-step, the expected likelihood is calculated under the parameters estimated  
 353 from the previous iteration. The mixture weights are then updated and carried  
 354 forward to the M-step. For the first iteration following initialization, the mixture  
 355 weights  $\mathbf{w}^{(1)}$  conditional on the initial parameterization are:

$$w_i^{(1)} = \frac{\sum_{j=1}^N y_{ij}^{(\text{init})}}{n} \quad (\text{S27})$$

356 where  $y_{ij}^{(\text{init})}$  is the probability that  $x_j$  belongs to component  $i$  given initial parameters:

$$y_{ij}^{(\text{init})} = \frac{w_i^{(\text{init})} f(x_j; \hat{\phi}_i^{(\text{init})}, \hat{\theta}_i^{(\text{init})})}{g(x_j; k, \mathbf{w}^{(\text{init})}, \boldsymbol{\phi}^{(\text{init})}, \boldsymbol{\theta}^{(\text{init})})} \quad (\text{S28})$$

357 In subsequent iterations, the equations are similarly:

$$w_i^{(t+1)} = \frac{\sum_{j=1}^N y_{ij}^{(t)}}{N} \quad (\text{S29})$$

$$y_{ij}^{(t)} = \frac{w_i^{(t)} f(x_j, \phi_i^{(t)}, \theta_i^{(t)})}{g(x_j; k, \mathbf{w}^{(t)}, \boldsymbol{\phi}^{(t)}, \boldsymbol{\theta}^{(t)})} \quad (\text{S30})$$

### 358 Maximization

359 During the M-step, estimates of  $\boldsymbol{\phi}$  and  $\boldsymbol{\theta}$  are updated using maximum likelihood  
 360 conditional on mixture weights calculated in the E-step:

$$\{\boldsymbol{\phi}^{(t+1)}, \boldsymbol{\theta}^{(t+1)}\} = \arg \max_{\boldsymbol{\phi}, \boldsymbol{\theta}} \mathcal{L}(\boldsymbol{\phi}, \boldsymbol{\theta}; \mathbf{x}, k, \mathbf{w}^{(t)}) \quad (\text{S31})$$

361 I used the `optim` function in R to find the parameters that maximized the likelihood  
 362 function. After the M-step, the next iteration begins at the E-step and continues  
 363 until the likelihood converges to a stable value. As with other hill-climbing likelihood  
 364 searches, EM does not guarantee convergence at the maximum likelihood. With the  
 365 stomatal ratio data, I found that multiple initialization procedures yielded the same  
 366 final parameter estimates, suggesting that the algorithm was successfully converging  
 367 on the maximum likelihood solution.

368 **Appendix S6: Cost-benefit model**

369 In this model, I opted to tradeoff the precision of a biophysical diffusion model for a  
 370 more general, albeit realistic, model with fewer parameters. Hence, the cost-benefit  
 371 model of stomatal ratio is true to the underlying physics but otherwise not strongly  
 372 dependent on specific assumptions. Future work will be needed to test if this more  
 373 general model is consistent with mechanistic biophysical models. The symbols used  
 374 in the model are summarized in Table S5.

**Table S4. Glossary of symbols used in the cost-benefit model.**

| Symbol           | Description                                                                 |
|------------------|-----------------------------------------------------------------------------|
| $SR$             | Stomatal ratio: ratio of upper to total stomatal density                    |
| $S$              | logit of stomatal ratio ( $SR$ )                                            |
| $S_{\text{opt}}$ | Stomatal ratio (logit scale) that maximizes fitness benefits                |
| $B_{\text{max}}$ | Maximum fitness benefit when $S = S_{\text{opt}}$                           |
| $\sigma^2$       | Shape factor of benefit function                                            |
| $C_{\text{max}}$ | Maximum fitness cost of when all stomata are on the upper side ( $SR = 1$ ) |
| $S_{\text{fit}}$ | Stomatal ratio maximizes fitness (benefits minus costs)                     |

375 I model selection on the logit of stomatal ratio (upper:total), which I denote  $S =$   
 376  $\text{logit}(SR) = \log(SR/(1-SR))$ , so that feasible trait variation ( $SR$  is constrained from  
 377 0 to 1) is continuous and unbounded. Fitness as a function of stomatal ratio depends  
 378 on the difference between the benefits ( $f(S)$ ) minus the costs ( $g(S)$ ). Therefore,  
 379 fitness as a function of stomatal ratio is:

$$W(S) = 1 + f(S) - g(S) \tag{S32}$$

380 Based on biophysical theory (1; 2), I assume that there is an intermediate optimal

381 stomatal ratio ( $S_{\text{opt}}$ ) at which photosynthetic rate is maximized. Above and be-  
382 low that optimum, photosynthetic rate decreases, which I modelled as a Gaussian  
383 function:

$$f(S) = B_{\text{max}} e^{-\frac{(S-S_{\text{opt}})^2}{2\sigma^2}} \quad (\text{S33})$$

384  $B_{\text{max}}$  defines the maximum fitness when  $S = S_{\text{opt}}$ .  $B_{\text{max}}$  is a complex function of the  
385 external environment, total stomatal conductance, internal photosynthetic capacity,  
386 and other factors. For simplicity, I do not explicitly model how these factors affect  
387  $B_{\text{max}}$  here, but rather treat it as a phenomenological variable.  $\sigma^2$  acts akin to a shape  
388 factor when the function is viewed from a logit scale. When  $\sigma^2$  is large, the benefit  
389 function has an inverted-U shape. There are increasing returns to fitness of the first  
390 few upper stomata, but diminishing returns to further increases in  $S$  (Fig. 3A).  
391 In contrast, when  $\sigma^2$  is small, the benefit function is more bell-shaped; the fitness  
392 benefit of the first few upper stomata is large, but with diminishing returns (Fig.  
393 3C).

394 I assumed a linear cost (e.g. increased susceptibility to foliar pathogens (32))  
395 for each additional upper stomate. Note however that the model is agnostic to the  
396 specific mechanism underlying the fitness cost or costs. The total cost as a function  
397 of stomatal ratio is the product of the total stomatal density, the stomatal ratio  
398 (upper:total density), and the cost per upper stomate. I define the slope of the cost  
399 function as  $C_{\text{max}}$ , which is equal to the total stomatal density times the cost per  
400 upper stomate:

$$h(SR) = C_{\max}SR \quad (\text{S34})$$

401 On a logit scale, the total cost asymptotically approaches  $C_{\max}$ :

$$g(S) = \frac{C_{\max}}{1 + e^{-S}} \quad (\text{S35})$$

402 If more were known about the cost of having upper stomata, a more realistic model  
 403 could be constructed. Without such knowledge, I believe it is judicious to start with  
 404 the simplest model that makes few assumptions and therefore could apply to a large  
 405 number of particular underlying mechanisms. Substituting Eqs S33 and S35 into  
 406 Eq S32, fitness as a function of  $S$  is:

$$W(S) = 1 + B_{\max}e^{-\frac{(S-S_{\text{opt}})^2}{2\sigma^2}} - \frac{C_{\max}}{1 + e^{-S}} \quad (\text{S36})$$

407 Note that if the cost function were applied to lower rather than upper stomata, as  
 408 might be the case for specialized taxa such as aquatic plants, then one could obtain  
 409 the same results, except that hyper- rather than hypostomy would prevail, as in the  
 410 Poaceae data. The fitness function is maximized where the marginal benefit of the  
 411 next upper stomate is equal to the marginal cost:

$$\frac{df(S)}{dS} = \frac{dg(S)}{dS} \quad (\text{S37})$$

412 I did not obtain an analytical solution, so instead I used the optim function in R



413 (64) to numerically solve for the stomatal ratio that maximized fitness ( $S_{\text{fit}}$ ) under  
414 varying ratios of fitness cost ( $C_{\text{max}}$ ) to benefit ( $B_{\text{max}}$ ). I tuned the benefit:cost ratio  
415 by fixing  $B_{\text{max}}$  to 1 and varying  $C_{\text{max}}$  between 0.01 and 100. I also varied the  
416 shape factor  $\sigma^2$  between 0.1 and 10, which appeared to capture the full range of  
417 relevant model behaviour. For all numerical solutions, I assumed that the optimal  
418 stomatal ratio for photosynthesis was 0.5, hence  $S_{\text{opt}} = 0$  on a logit scale. Next,  
419 I generated hypothetical trait distributions under a scenario where the benefit:cost  
420 ratio varies uniformly from  $10^{-2}$  to  $10^2$ . I solved for  $S_{\text{fit}}$  with  $10^4$  evenly spaced  
421 values of  $B_{\text{max}} : C_{\text{max}}$  under low, medium, and high values of  $\sigma^2$ . R code for finding  
422 numerical solutions is available from Dryad (50).

## 423 Appendix S7: Data Sources

- 424 1. Boeger and Gluzezak 2006
- 425 2. Brodribb *et al.* 2013
- 426 3. Camargo and Marengo 2011
- 427 4. Cooper and Cass 2003 ; Cooper *et al.* 2004
- 428 5. Dickie and Gasson 1999
- 429 6. Dunbar-Co *et al.* 2009
- 430 7. Fahmy 1997
- 431 8. Fahmy *et al.* 2007
- 432 9. Fontenelle *et al.* 1994
- 433 10. Giuliani *et al.* 2013
- 434 11. Holbrook and Putz 1996
- 435 12. Körner *et al.* 1989
- 436 13. Lohr 1919
- 437 14. Loranger and Shipley 2010
- 438 15. Malaisse and Colonval-Elenkov 1982
- 439 16. Maricle *et al.* 2009

- 440 17. Muir *et al.* 2014
- 441 18. Parkin and Pearson 1903
- 442 19. Peace and MacDonald 1981
- 443 20. Rao and Tan 1980
- 444 21. Reed *et al.* 2000
- 445 22. Ridge *et al.* 1984
- 446 23. Selvi and Bigazzi 2001
- 447 24. Seshavatharam and Srivalli 1989
- 448 25. Sobrado and Medina 1980

449 **Appendix S8: Additional detail on stomatal ratio distributions**  
450 **within families**

451 There were at least two selective regimes in 9 of 10 families analyzed (Fig. 2). In  
452 one family, Rubiaceae, all species were inferred as members of a hypostomatous  
453 regime. Two regimes are supported in most (8 of 9) multi-regime families, except  
454 Asteraceae, in which three regimes are favoured (Fig. 2A). In all multi-regime families  
455 except Poaceae, there are distinct regimes associated with hypo- and amphistomy;  
456 in Poaceae, there are hyper- and amphistomous regimes instead (Fig. 2E). However,  
457 the hyperstomatous species of Poaceae in this study may not be representative of  
458 the family since they are wetland specialists in the genus *Spartina* (77). Generally,  
459 the internal (i.e. amphistomatous) mode is closely centered around 0.5, as predicted  
460 from biophysical theory (1; 2), except in the Rosaceae, where the inferred optimum  
461 is closer to 0.25.

## 462 SI References

- 463 [1] Parkhurst, D. F., 1978 The adaptive significance of stomatal occurrence on one  
464 or both surfaces of leaves. *The Journal of Ecology* **66**, 367–383.
- 465 [2] Gutschick, V. P., 1984 Photosynthesis model for C<sub>3</sub> leaves incorporating CO<sub>2</sub>  
466 transport, propagation of radiation, and biochemistry 2. ecological and agricul-  
467 tural utility. *Photosynthetica* **18**, 569–595.
- 468 [3] Parkhurst, D. F. & Mott, K. A., 1990 Intercellular diffusion limits to CO<sub>2</sub> uptake  
469 in leaves studied in air and helox. *Plant Physiology* **94**, 1024–1032.
- 470 [4] Smith, W. K., Bell, D. T. & Shepherd, K. A., 1998 Associations between leaf  
471 structure, orientation, and sunlight exposure in five Western Australian com-  
472 munities. *American Journal of Botany* **85**, 51–63.
- 473 [5] James, S. A. & Bell, D. T., 2001 Leaf morphological and anatomical character-  
474 istics of heteroblastic *Eucalyptus globulus* ssp. *globulus* (myrtaceae). *Australian*  
475 *Journal of Botany* **49**, 259–269.
- 476 [6] Burrows, G., 2001 Comparative anatomy of the photosynthetic organs of 39  
477 xeromorphic species from subhumid New South Wales, Australia. *International*  
478 *Journal of Plant Sciences* **162**, 411–430.
- 479 [7] Williams, M., Woodward, F. I., Baldocchi, D. D. & Ellsworth, D. S., 2004 CO<sub>2</sub>  
480 capture: Leaf to landscape. In *Photosynthetic Adaptation* (eds. W. K. Smith,  
481 T. C. Vogelmann & C. Critchley), pp. 133–168. New York: Springer.
- 482 [8] Brodribb, T. J., Jordan, G. J. & Carpenter, R. J., 2013 Unified changes in cell

- 483 size permit coordinated leaf evolution. *New Phytologist* **199**, 559–570.
- 484 [9] Muir, C. D., Hangarter, R. P., Moyle, L. C. & Davis, P. A., 2014 Morphologi-  
485 cal and anatomical determinants of mesophyll conductance in wild relatives of  
486 tomato (*Solanum* sect. *Lycopersicon*, sect. *Lycopersicoides*; Solanaceae). *Plant*,  
487 *Cell & Environment* **37**, 1415–1426.
- 488 [10] Goble-Garratt, E., Bell, D. & Loneragan, W., 1981 Floristic and leaf structure  
489 patterns along a shallow elevational gradient. *Australian Journal of Botany* **29**,  
490 329–347.
- 491 [11] Mott, K. A., Gibson, A. C. & O’Leary, J. W., 1984 The adaptive significance of  
492 amphistomatic leaves. *Plant, Cell & Environment* **5**, 455–460.
- 493 [12] Beerling, D. J. & Kelly, C. K., 1996 Evolutionary comparative analyses of the  
494 relationship between leaf structure and function. *New Phytologist* **134**, 35–51.
- 495 [13] Poorter, H., Niinemets, Ü., Walter, A., Fiorani, F. & Schurr, U., 2010 A method  
496 to construct dose–response curves for a wide range of environmental factors  
497 and plant traits by means of a meta-analysis of phenotypic data. *Journal of*  
498 *Experimental Botany* **61**, 2043–2055.
- 499 [14] Gibson, A. C., 1996 *Structure-Function Relations of Warm Desert Plants*.  
500 Berlin: Springer-Verlag.
- 501 [15] Lohr, P. L., 1919 *Untersuchungen über die Blattantomie von Alphen- und Ebe-*  
502 *nenpflanzen*. Ph.D. thesis, Universität Basel.
- 503 [16] Fitter, A. & Peat, H., 1994 The ecological flora database. *Journal of Ecology*  
504 **82**, 415–425.

- 505 [17] Jordan, G. J., Carpenter, R. J. & Brodribb, T. J., 2014 Using fossil leaves as  
506 evidence for open vegetation. *Palaeogeography, Palaeoclimatology, Palaeoecology*  
507 **395**, 168–175.
- 508 [18] Wood, J. G., 1934 The physiology of xerophytism in Australian plants: the  
509 stomatal frequencies, transpiration and osmotic pressures of sclerophyll and  
510 tomentose-succulent leaved plants. *Journal of Ecology* **22**, 69–87.
- 511 [19] Mott, K. A. & O’Leary, J. W., 1984 Stomatal behavior and CO<sub>2</sub> exchange  
512 characteristics in amphistomatous leaves. *Plant physiology* **74**, 47–51.
- 513 [20] Spinner, H., 1936 Stomates et altitude. *Berichte der Schweizerischen Botanischen*  
514 *Gesellschaft* **46**, 12–27.
- 515 [21] Woodward, F. I., 1986 Ecophysiological studies on the shrub *Vaccinium myr-*  
516 *tillus* l. taken from a wide altitudinal range. *Oecologia* **70**, 580–586.
- 517 [22] Körner, C., Neumayer, M., Menendez-Riedl, S. P. & Smeets-Scheel, A., 1989  
518 Functional morphology of mountain plants. *Flora* **182**, 353–383.
- 519 [23] Vogel, S., 2012 *The Life of a Leaf*. Chicago: University of Chicago Press.
- 520 [24] Metcalfe, C. R. & Chalk, L., 1950 *Anatomy of the dicotyledons, Vols. 1 & 2*.  
521 Oxford: Oxford University Press, first edition.
- 522 [25] Franks, P. J. & Beerling, D. J., 2009 Maximum leaf conductance driven by  
523 CO<sub>2</sub> effects on stomatal size and density over geologic time. *Proceedings of the*  
524 *National Academy of Sciences* **106**, 10343–10347.

- 525 [26] Foster, J. & Smith, W., 1986 Influence of stomatal distribution on transpiration  
526 in low-wind environments. *Plant, Cell & Environment* **9**, 751–759.
- 527 [27] Gates, F. C., 1914 Winter as a factor in the xerophily of certain evergreen  
528 ericads. *Botanical Gazette* **57**, 445–489.
- 529 [28] Pospíšilová, J. & Solárová, J., 1984 Environmental and biological control of  
530 diffusive conductances of adaxial and abaxial leaf epidermes. *Photosynthetica*  
531 **18**, 445–453.
- 532 [29] Smith, W., 1981 Temperature and water relation patterns in subalpine under-  
533 story plants. *Oecologia* **48**, 353–359.
- 534 [30] Reich, P., 1984 Relationships between leaf age, irradiance, leaf conductance,  
535 CO<sub>2</sub> exchange, and water-use efficiency in hybrid poplar. *Photosynthetica* **18**,  
536 445–453.
- 537 [31] Smith, W. K. & McClean, T. M., 1989 Adaptive relationship between leaf wa-  
538 ter repellency, stomatal distribution, and gas exchange. *American Journal of*  
539 *Botany* **76**, 465–469.
- 540 [32] McKown, A. D., Guy, R. D., Quamme, L., Klápště, J., La Mantia, J., Constabel,  
541 C., El-Kassaby, Y. A., Hamelin, R. C., Zifkin, M. & Azam, M., 2014 Association  
542 genetics, geography and ecophysiology link stomatal patterning in *Populus tri-*  
543 *chocarpa* with carbon gain and disease resistance trade-offs. *Molecular Ecology*  
544 **23**, 5771–5790.
- 545 [33] Napp-Zinn, K., 1970 *Anatomie des blattes*. Berlin: Borntraeger.



- 546 [34] Metcalfe, C. R. & Chalk, L., 1979 *Anatomy of the dicotyledons, Vols. 1 & 2*.  
547 Oxford: Clarendon Press, second edition.
- 548 [35] Abràmoff, M. D., Magalhães, P. J. & Ram, S. J., 2004 Image processing with  
549 imagej. *Biophotonics International* **11**, 36–42.
- 550 [36] Leick, E., 1927 Untersuchungen über den Einfluß des Lichtes auf die öff-  
551 nungsweite unterseitiger und oberseitiger Stomata desselben Blattes. *Jahrbücher*  
552 *für Wissenschaftliche Botanik* **67**, 771–848.
- 553 [37] Salisbury, E., 1927 On the causes and ecological significance of stomatal fre-  
554 quency, with special reference to the woodland flora. *Philosophical Transactions*  
555 *of the Royal Society of London. Series B* **216**, 1–65.
- 556 [38] Hijmans, R. J., Cameron, S. E., Parra, J. L., Jones, P. G. & Jarvis, A., 2005 Very  
557 high resolution interpolated climate surfaces for global land areas. *International*  
558 *Journal of Climatology* **25**, 1965–1978.
- 559 [39] Los, S. O., 2010 ISLSCP II FASIR-adjusted NDVI, 1982-1998. volume 10.
- 560 [40] Chamberlain, S., Ram, K., Barve, V. & Mcglinn, D., 2014 *rgbif: Interface to*  
561 *the Global Biodiversity Information Facility API*. R package version 0.7.8.99.
- 562 [41] USDA, NRCS, 2014. The plants database. Available:  
563 <http://www.plants.usda.gov>.
- 564 [42] Encyclopedia of Life, 2015. Available at: <http://www.eol.org>.
- 565 [43] Boyle, B., Hopkins, N., Lu, Z., Garay, J. A. R., Mozzherin, D., Rees, T., Matasci,  
566 N., Narro, M. L., Piel, W. H., Mckay, S. J. *et al.*, 2013 The taxonomic name

- 567 resolution service: an online tool for automated standardization of plant names.  
568 *BMC bioinformatics* **14**, 16.
- 569 [44] The Plant List, 2013. Version 1.1. Available: <http://www.theplantlist.org/>.
- 570 [45] The International Plant Names Index, 2015. Available at: <http://www.ipni.org>.
- 571 [46] Euro+Med Plantbase, 2015. Available at: <http://www.emplantbase.org>.
- 572 [47] Giuliani, R., Koteyeva, N., Voznesenskaya, E., Evans, M. A., Cousins, A. B. &  
573 Edwards, G. E., 2013 Coordination of leaf photosynthesis, transpiration, and  
574 structural traits in rice and wild relatives (genus *Oryza*). *Plant Physiology* **162**,  
575 1632–1651.
- 576 [48] Webb, C. O. & Donoghue, M. J., 2005 Phylomatic: tree assembly for applied  
577 phylogenetics. *Molecular Ecology Notes* **5**, 181–183.
- 578 [49] Orme, C. D. L., Freckleton, R. P., Thomas, G. H., Petzoldt, T., Fritz, S. A.,  
579 Isaac, N. J. B. & Pearse, W. D., 2013 *caper: Comparative Analyses of Phyloge-*  
580 *netics and Evolution in R*. R package version 0.5.2.
- 581 [50] Muir, C. D., 2015 *Data from: Making pore choices: repeated regime shifts in*  
582 *stomatal ratio*. *Dryad Digital Repository*.
- 583 [51] Hansen, T. F., 1997 Stabilizing selection and the comparative analysis of adap-  
584 tation. *Evolution* **51**, 1341–1351.
- 585 [52] Hansen, T. F., 2012 Adaptive landscapes and the comparative analysis of adap-  
586 tation. In *The Adaptive Landscape in Evolutionary Biology* (eds. E. Svensson &  
587 R. Calsbeek), pp. 205–226. Oxford, UK: Oxford University Press.

- 588 [53] Pennell, M. W. & Harmon, L. J., 2013 An integrative view of phylogenetic  
589 comparative methods: connections to population genetics, community ecology,  
590 and paleobiology. *Annals of the New York Academy of Sciences* **1289**, 90–105.
- 591 [54] Butler, M. & King, A. A., 2004 Phylogenetic comparative analysis: a modeling  
592 approach for adaptive evolution. *The American Naturalist* **164**, 683–695.
- 593 [55] Ingram, T. & Mahler, D. L., 2013 SURFACE: detecting convergent evolu-  
594 tion from comparative data by fitting Ornstein-Uhlenbeck models with stepwise  
595 Akaike Information Criterion. *Methods in Ecology and Evolution* **4**, 416–425.
- 596 [56] Uyeda, J. C. & Harmon, L. J., 2014 A novel Bayesian method for inferring and  
597 interpreting the dynamics of adaptive landscapes from phylogenetic comparative  
598 data. *Systematic Biology* **64**, 902–918.
- 599 [57] Otto, S. P. & Day, T., 2007 *A Biologist’s Guide to Mathematical Modeling in*  
600 *Ecology and Evolution*. Princeton, New Jersey: Princeton University Press.
- 601 [58] Revell, L. J., 2012 phytools: An R package for phylogenetic comparative biology  
602 (and other things). *Methods in Ecology and Evolution* **3**, 217–223.
- 603 [59] Huelsenbeck, J. P., Nielsen, R. & Bollback, J. P., 2003 Stochastic mapping of  
604 morphological characters. *Systematic Biology* **52**, 131–158.
- 605 [60] Beaulieu, J. M., Jhwueng, D.-C., Boettiger, C. & O’Meara, B. C., 2012 Mod-  
606 eling stabilizing selection: expanding the Ornstein–Uhlenbeck model of adaptive  
607 evolution. *Evolution* **66**, 2369–2383.
- 608 [61] Beaulieu, J. M. & O’Meara, B., 2015 *OUwie: Analysis of Evolutionary Rates in*  
609 *an OU Framework*. R package version 1.45.

- 610 [62] Bossu, C. M. & Near, T. J., 2015 Ecological constraint and the evolution of  
611 sexual dichromatism in darters. *Evolution* **69**, 1219–1231.
- 612 [63] Grün, B., Kosmidis, I. & Zeileis, A., 2012 Extended beta regression in R: Shaken,  
613 stirred, mixed, and partitioned. *Journal of Statistical Software* **48**, 1–25.
- 614 [64] R Core Team, 2013 *R: A Language and Environment for Statistical Computing*.  
615 R Foundation for Statistical Computing, Vienna, Austria.
- 616 [65] Boeger, M. R. T. & Gluzezak, R. M., 2006 Adaptações estruturais de sete espé-  
617 cies de plantas para as condições ambientais da área de dunas de Santa Catarina,  
618 Brasil. *Iheringia, Série Botânica* **61**, 73–82.
- 619 [66] Camargo, M. A. B. & Marengo, R. A., 2011 Density, size and distribution of  
620 stomata in 35 rainforest tree species in Central Amazonia. *Acta Amazonica* **41**,  
621 205–212.
- 622 [67] Cooper, R. L. & Cass, D. D., 2003 A comparative epidermis study of the  
623 Athabasca sand dune willows (*Salix*; Salicaceae) and their putative progenitors.  
624 *Canadian Journal of Botany* **81**, 749–754.
- 625 [68] Cooper, R. L., Ware, J. V. & Cass, D. D., 2004 Leaf thickness of *Salix* spp.  
626 (Salicaceae) from the Athabasca sand dunes of northern Saskatchewan, Canada.  
627 *Canadian Journal of Botany* **82**, 1682–1686.
- 628 [69] Dickie, J. & Gasson, P., 1999 Comparative leaf anatomy of the Penaeaceae  
629 and its ecological implications. *Botanical Journal of the Linnean Society* **131**,  
630 327–351.
- 631 [70] Dunbar-Co, S., Sporck, M. J. & Sack, L., 2009 Leaf trait diversification and

- 632 design in seven rare taxa of the Hawaiian *Plantago* radiation. *International*  
633 *Journal of Plant Sciences* **170**, 61–75.
- 634 [71] Fahmy, G. M., 1997 Leaf anatomy and its relation to the ecophysiology of some  
635 non-succulent desert plants from Egypt. *Journal of Arid Environments* **36**,  
636 499–526.
- 637 [72] Fahmy, G. M., Hegazy, A. K., Ali, M. I. A. & Gomaa, N. H., 2007 Structure-  
638 function relations of leaves in 24 species of winter and summer weeds. *Global*  
639 *Journal of Environmental Research* **1**, 103–116.
- 640 [73] Fontenelle, G., Costa, C. & Machado, R., 1994 Foliar anatomy and micromor-  
641 phology of eleven species of *Eugenia* L.(Myrtaceae). *Botanical Journal of the*  
642 *Linnean Society* **116**, 111–133.
- 643 [74] Holbrook, N. M. & Putz, F., 1996 From epiphyte to tree: differences in leaf  
644 structure and leaf water relations associated with the transition in growth form  
645 in eight species of hemiepiphytes. *Plant, Cell & Environment* **19**, 631–642.
- 646 [75] Loranger, J. & Shipley, B., 2010 Interspecific covariation between stomatal den-  
647 sity and other functional leaf traits in a local flora. *Botany* **88**, 30–38.
- 648 [76] Malaisse, F. & Colonval-Elenkov, E., 1982 On the leaf anatomy of trees and  
649 shrubs of the montane evergreen foresst of Malawi and Zimbabwe. *Geo-Eco-*  
650 *Trop* **6**, 139–160.
- 651 [77] Maricle, B. R., Koteyeva, N. K., Voznesenskaya, E. V., Thomasson, J. R. &  
652 Edwards, G. E., 2009 Diversity in leaf anatomy, and stomatal distribution and

- 653 conductance, between salt marsh and freshwater species in the C<sub>4</sub> genus *Spartina*  
654 (Poaceae). *New Phytologist* **184**, 216–233.
- 655 [78] Parkin, J. & Pearson, H. H. W., 1903 The botany of the Ceylon patanas. *Journal*  
656 *of the Linnean Society of London, Botany* **35**, 430–463.
- 657 [79] Peace, W. & Macdonald, F., 1981 An investigation of the leaf anatomy, foliar  
658 mineral levels, and water relations of trees of a Sarawak forest. *Biotropica* **13**,  
659 100–109.
- 660 [80] Rao, A. N. & Tan, H., 1980 Leaf structure and its ecological significance in  
661 certain mangrove plants. In *Proceedings of the Asian Symposium on Mangrove*  
662 *Environment: Research and Management* (eds. E. Soepadmo, A. N. Rap & D. J.  
663 MacIntosh), pp. 183–194. Ardyas.
- 664 [81] Read, J., Edwards, C., Sanson, G. D. & Aranwela, N., 2000 Relationships be-  
665 tween sclerophylly, leaf biomechanical properties and leaf anatomy in some Aus-  
666 tralian heath and forest species. *Plant Biosystems* **134**, 261–277.
- 667 [82] Ridge, R., Loneragan, W., Bell, D., Colquhoun, I. & Kuo, J., 1984 Comparative  
668 studies in selected species of *Eucalyptus* used in rehabilitation of the northern  
669 Jarrah forest, Western Australia. ii. wood and leaf anatomy. *Australian Journal*  
670 *of Botany* **32**, 375–386.
- 671 [83] Selvi, F. & Bigazzi, M., 2001 Leaf surface and anatomy in Boraginaceae tribe  
672 Boragineae with respect to ecology and taxonomy. *Flora* **196**, 269–285.
- 673 [84] Seshavatharam, V. & Srivalli, M., 1989 Systematic leaf anatomy of some Indian

674 mangroves. *Proceedings of the Indian Academy of Sciences: Plant Sciences* **99**,  
675 557–565.

676 [85] Sobrado, M. & Medina, E., 1980 General morphology, anatomical structure,  
677 and nutrient content of sclerophyllous leaves of the "Bana" vegetation of  
678 Amazonas. *Oecologia* **45**, 341–345.
